# Supplementary material
Source: PubMed Central journal article supplement (PMC6600187)

**Supplemental Fig. 2.** The structure and functional domains of A/CK/PB/16 polymerase complex. The subunits and domains of interaction are shown as endonuclease, PB1-C terminal/PB2-N terminal, PB2-cap and 627-NLS domains. The red spheres in the protein structure indicate amino acid changes from A/CK/JL/12 to A/CK/PB16 virus. The amino acid changes indicated in linear protein representations correspond to changes found in other studies associated with chicken or duck virus adaptation.

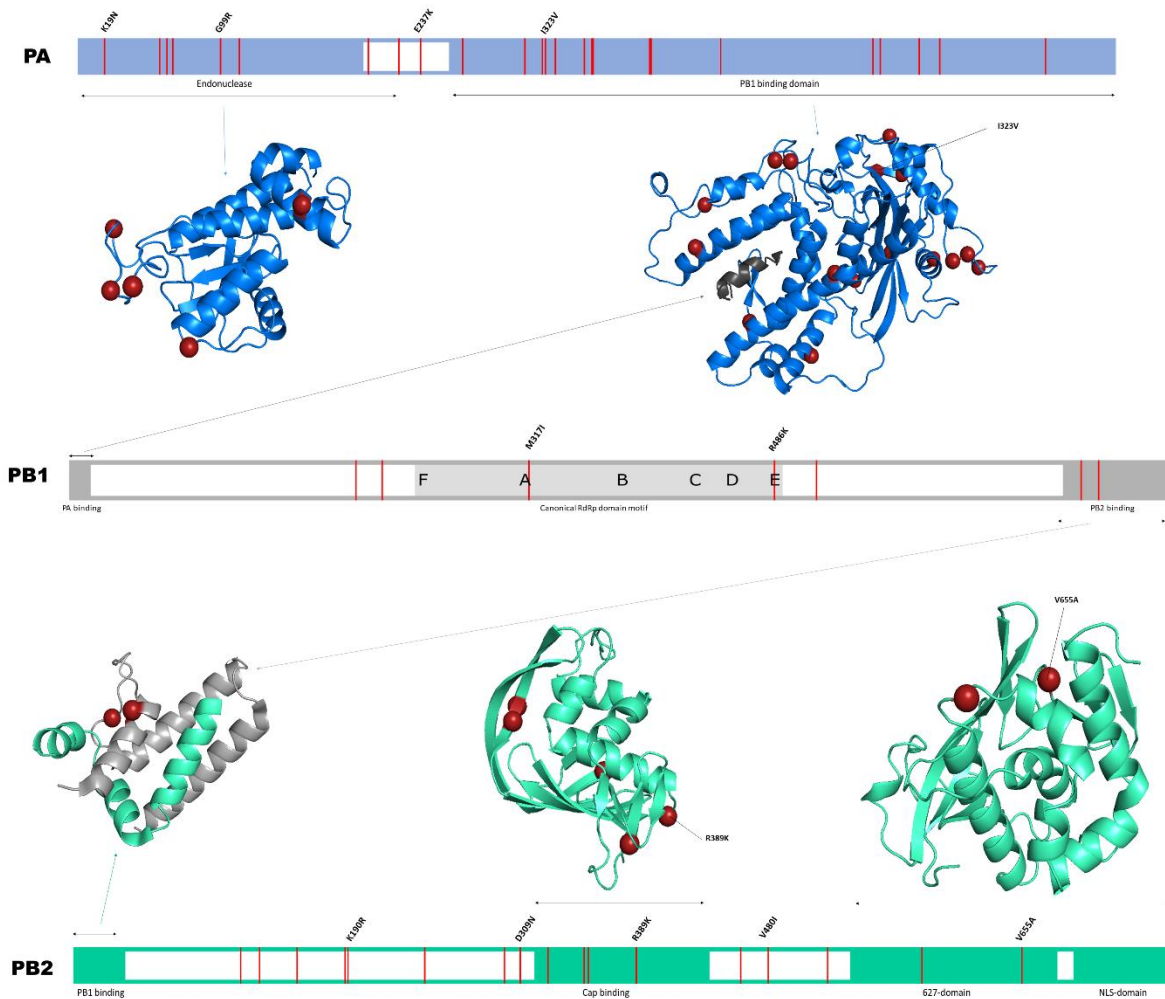

Supplement: JVI.00543-19-s0002.pdf [file JVI.00543-19-s0002.pdf]
