# Supplementary material
Source: PubMed Central journal article supplement (PMC6600187)

PA

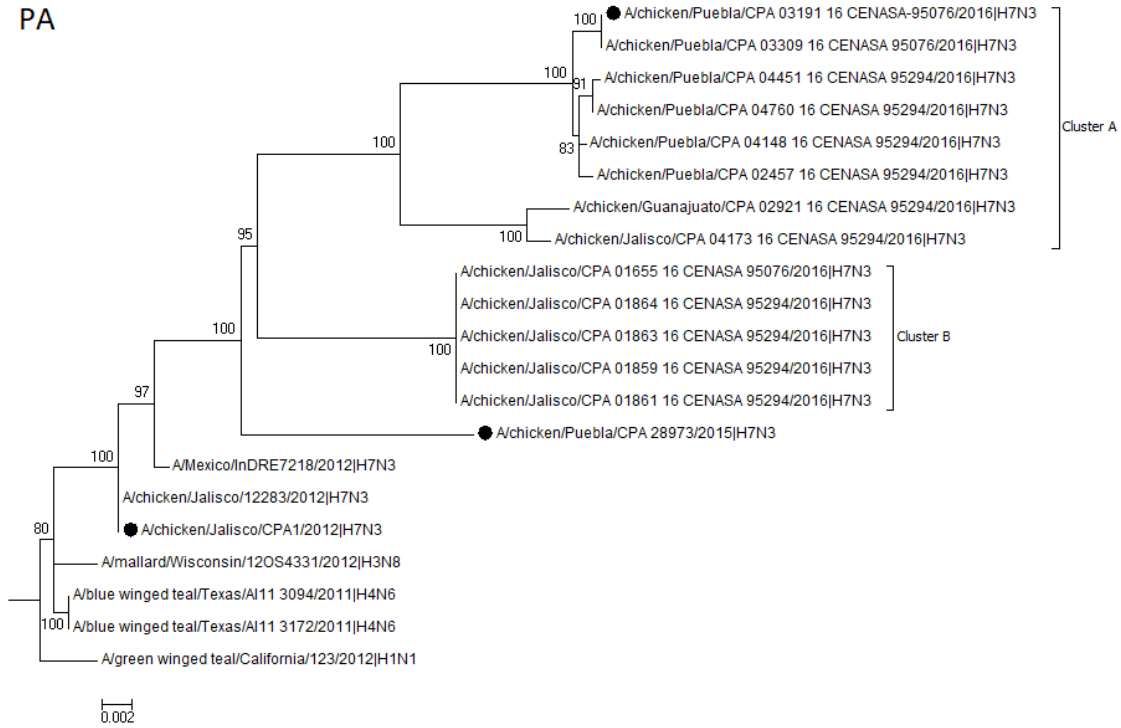

HA

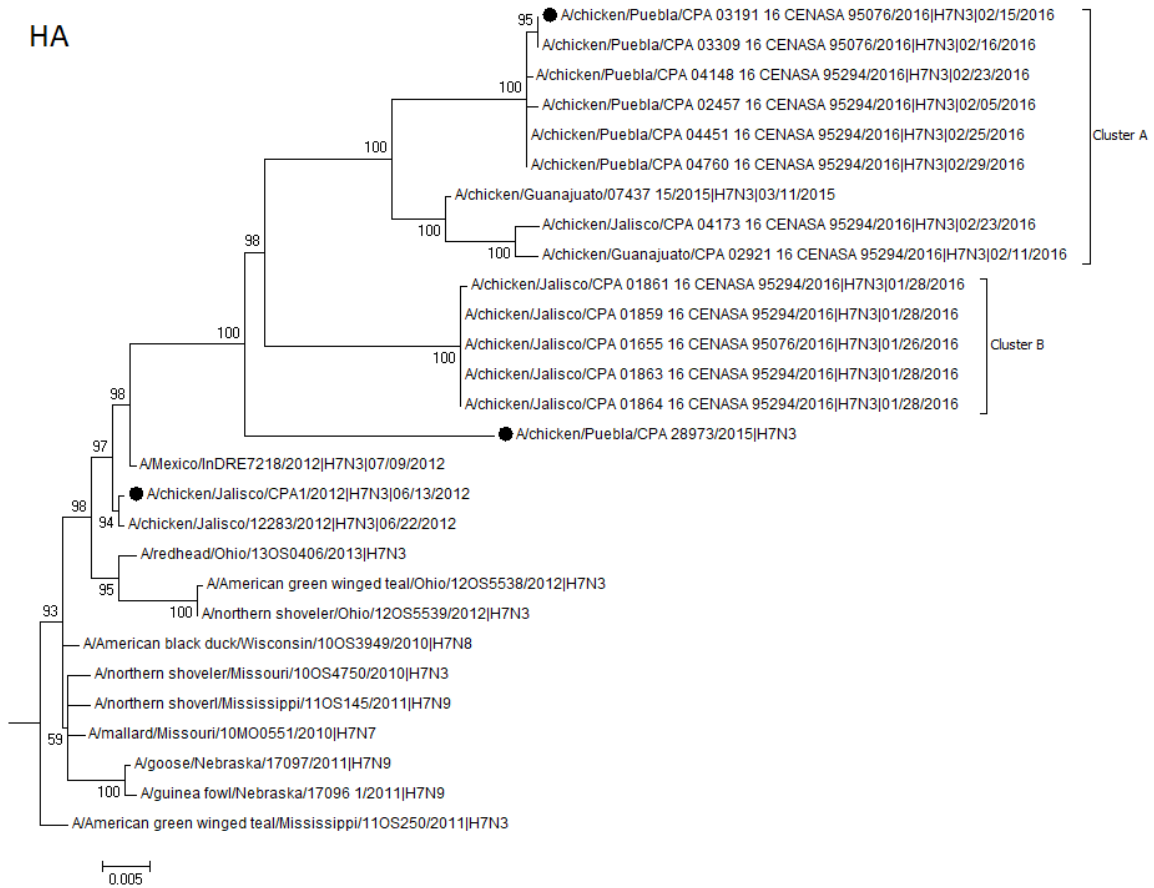

NP

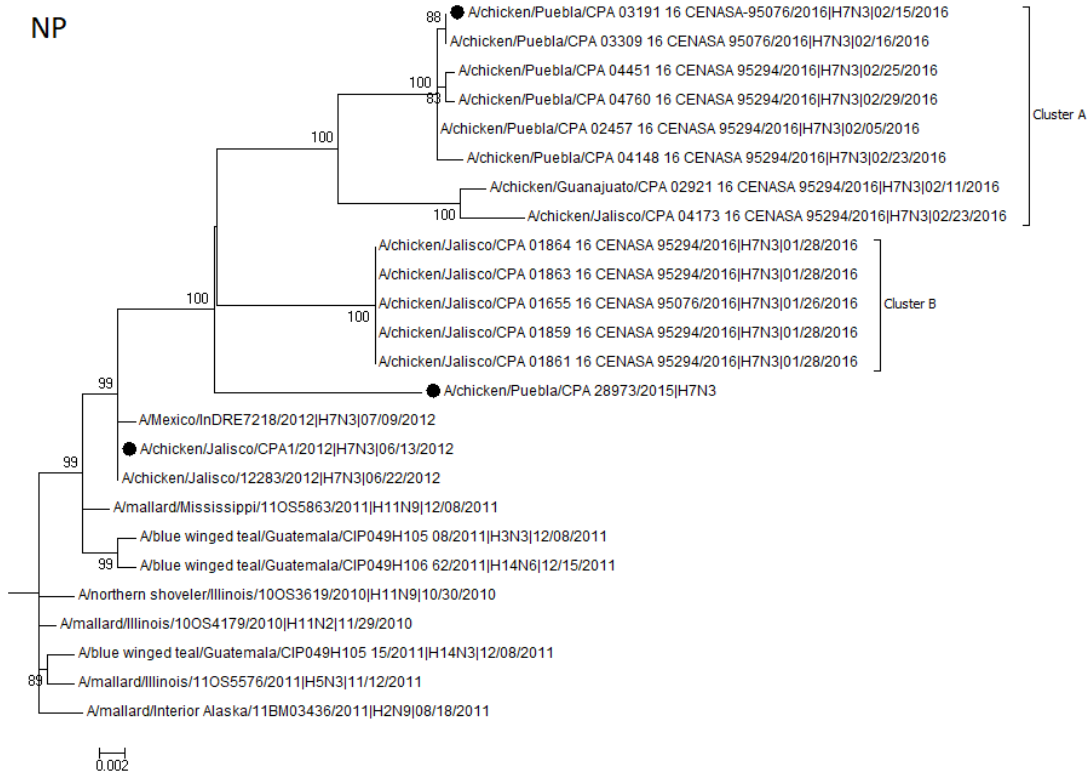

NA

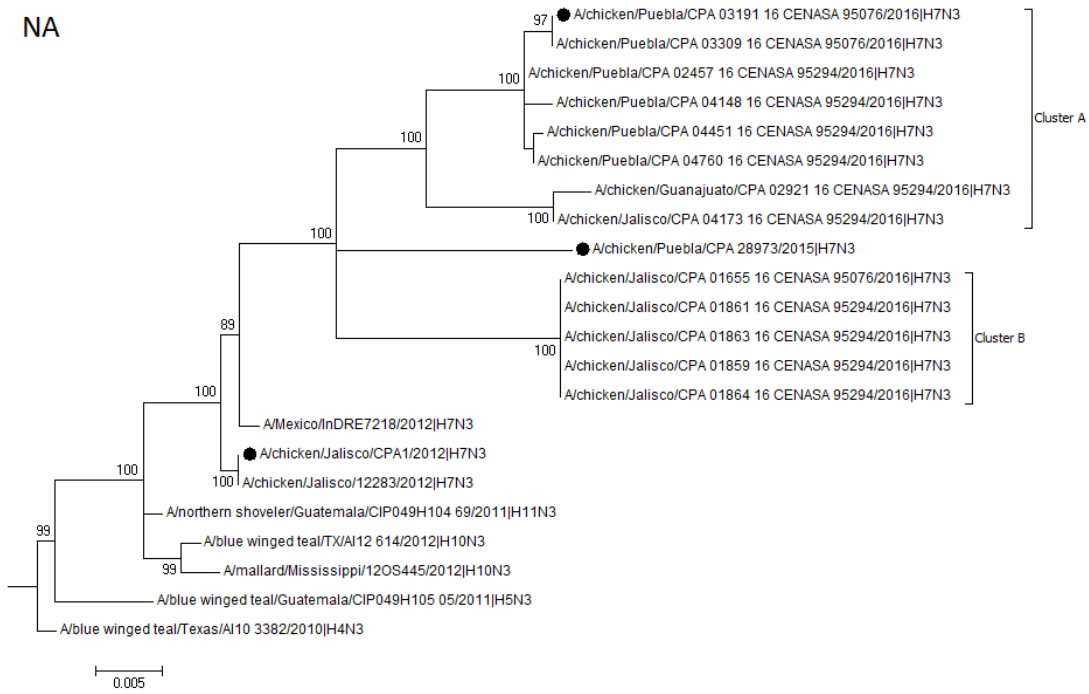

M

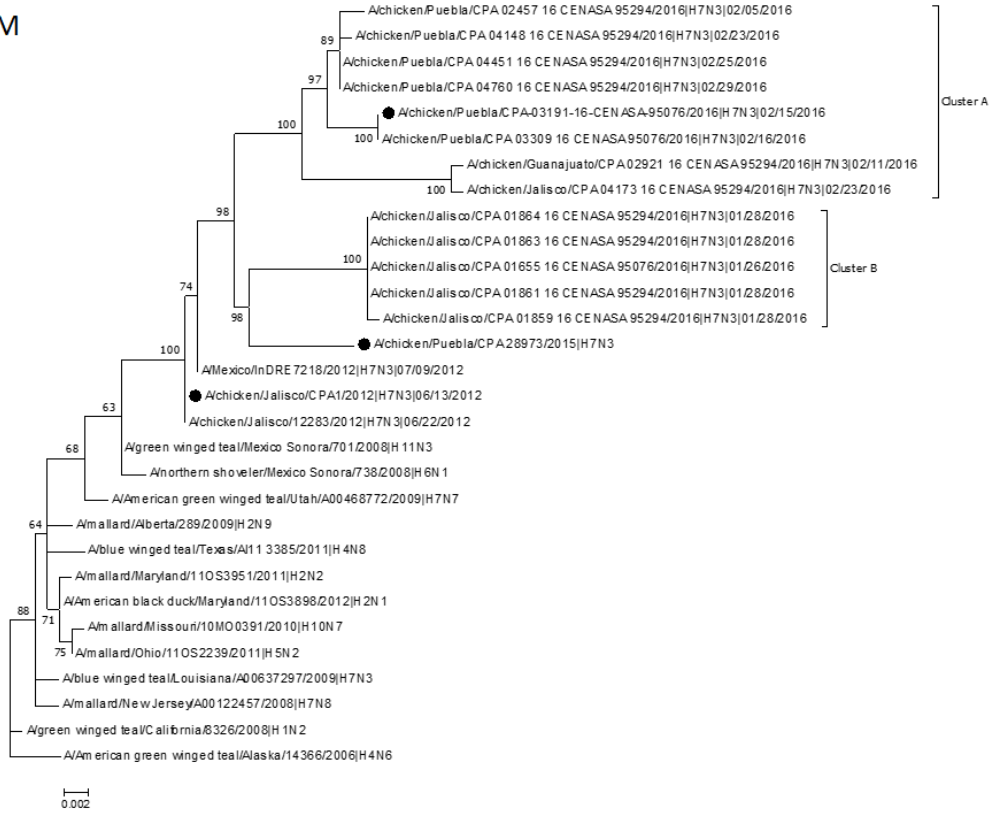

NS

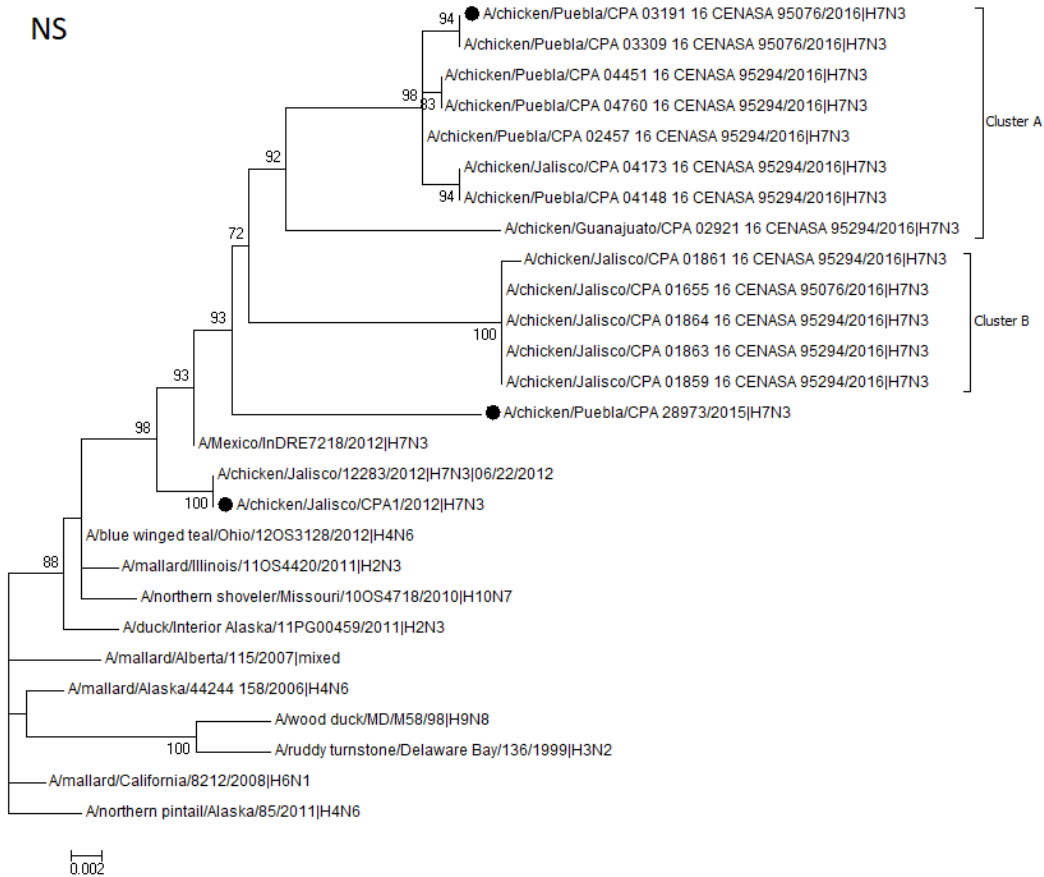

Supplement: JVI.00543-19-s0001.pdf [file JVI.00543-19-s0001.pdf]
